# Supplementary material for: Effect of Tube Diameters and Functional Groups on Adsorption and Suspension Behaviors of Carbon Nanotubes in Presence of Humic Acid
Source: MDPI journal article supplement (doi:10.3390/nano12091592), 2022-05-07
Supplement: s1 [file s1]

## Supplementary Materials

# Effect of tube diameters and functional groups on adsorption and suspension behaviors of carbon nanotubes in presence of humic acid

Mengyuan Fang <sup>1,2,†</sup>, Tianhui Zhao <sup>1,†</sup>, Xiaoli Zhao <sup>1</sup>, Zhi Tang <sup>1,\*</sup>, Shasha Liu <sup>3</sup>, Junyu Wang <sup>1</sup>, Lin Niu <sup>1</sup> and Fengchang Wu <sup>1</sup>

<sup>1</sup> State Key Laboratory of Environmental Criteria and Risk Assessment, Chinese Research Academy of Environmental Sciences, Beijing 100012, China; fangmengyuanfmy@163.com (M.F.); zth2512@163.com (T.Z.); zhaoxiaoli\_zxl@126.com (X.Z.); jy.wong@foxmail.com (J.W.); 18233271321@163.com (L.N.); wufengchang@mail.gyig.ac.cn (F.W.)

<sup>2</sup> College of Geoexploration Science and Technology, Jilin University, Changchun 130026, China

<sup>3</sup> School of Energy and Environmental Engineering, University of Science and Technology Beijing, Beijing, 100083, China; liushashajida@163.com

\* Correspondence: tzwork@hotmail.com; Tel: 86-10-84931804

† These authors contributed equally to this work.

**Table S1** Specific surface areas of MWNTs and HMWNTs prior to and after adsorbed HA

| Samples | OD (nm) | BET (m <sup>2</sup> g <sup>-1</sup> ) | BET after adsorption (m <sup>2</sup> g <sup>-1</sup> ) | The rate of reduction of BET* (%) |
|---------|---------|---------------------------------------|--------------------------------------------------------|-----------------------------------|
| MWNTs   | 4–6     | 495.52                                | 342.41                                                 | 30.90                             |
|         | 5–15    | 319.88                                | 213.78                                                 | 33.17                             |
|         | 20–30   | 161.65                                | 129.49                                                 | 19.89                             |
| HMWNTs  | 4–6     | 549.72                                | 471.58                                                 | 14.21                             |
|         | 5–15    | 250.40                                | 220.42                                                 | 11.97                             |
|         | 20–30   | 181.76                                | 135.11                                                 | 25.67                             |

\* The decreased rate of the specific surface area (BET) of CNTs after adsorption of HA.

**Table S2** Parameters of Temkin and Dubinin-Radushkevich adsorption isotherms for HA adsorption on MWNTs and HMWNTs

| Samples | Temkin         |                |                | Dubinin-Radushkevich |                    |                |
|---------|----------------|----------------|----------------|----------------------|--------------------|----------------|
|         | a <sub>t</sub> | b <sub>t</sub> | R <sup>2</sup> | q <sub>m</sub>       | k×10 <sup>-5</sup> | R <sup>2</sup> |
| MWNT-1  | 0.252          | 82.42          | 0.958          | 61.99                | 1.032              | 0.932          |
| MWNT-2  | 0.398          | 157.01         | 0.929          | 3.23                 | 0.291              | 0.832          |
| MWNT-3  | 0.178          | 157.61         | 0.933          | 29.25                | 1.921              | 0.803          |
| HMWNT-1 | 0.290          | 218.67         | 0.928          | 21.67                | 0.566              | 0.670          |

|          |       |        |       |       |       |       |
|----------|-------|--------|-------|-------|-------|-------|
| HMWNT-2  | 0.253 | 206.98 | 0.975 | 22.56 | 0.824 | 0.840 |
| HMWNTs-3 | 0.252 | 219.45 | 0.921 | 20.78 | 0.614 | 0.594 |

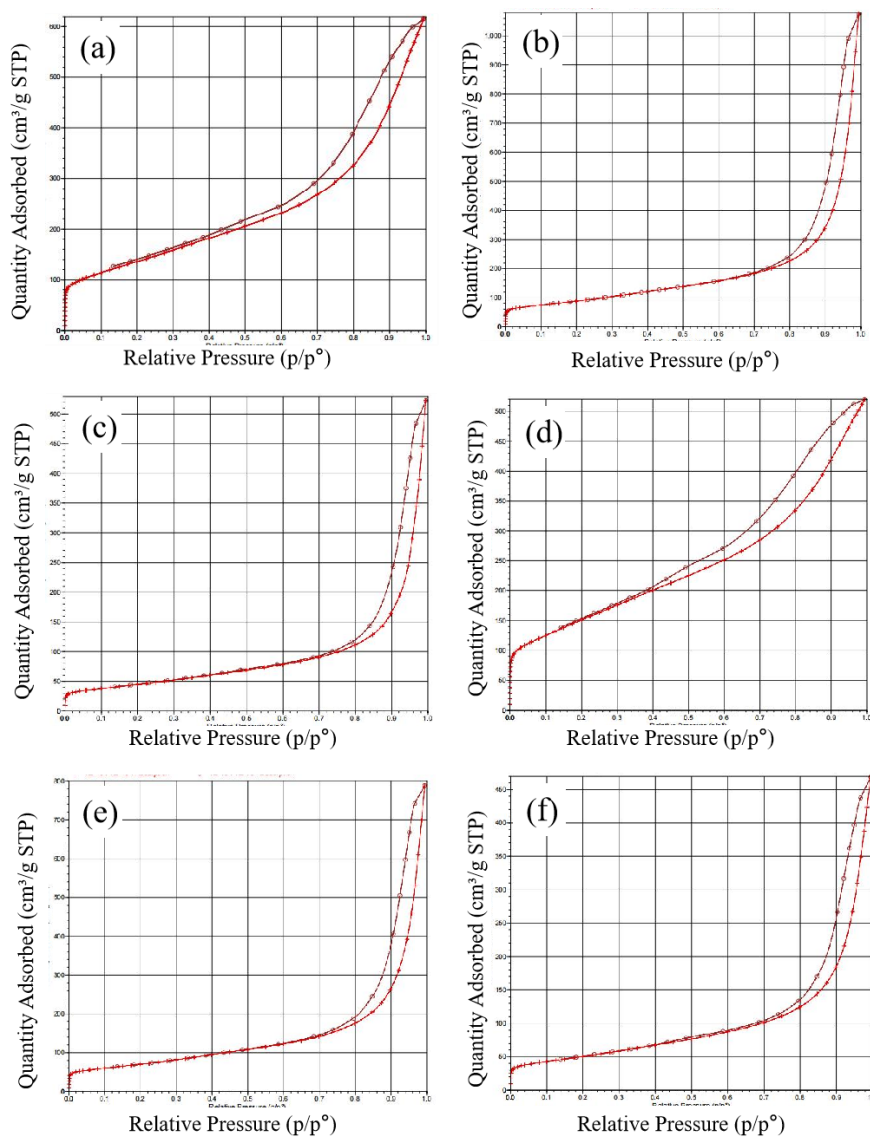

**Figure S1.** Nitrogen adsorption isotherms of MWNTs (a)(b)(c) and HMWNTs(d)(e)(f)

To better understand the adsorption behavior of HA on the surfaces of MWNT-1 and MWNT-2, we also used Temkin (Eq. (1)) and Dubinin-Radushkevich (Eq. (2), (3)) adsorption isotherms to analyze the adsorption of HA shown in Figure S2 and Figure S3.

$$q_e = \frac{RT}{b_t} \ln a_t + \frac{RT}{b_t} \ln C_e \quad (1)$$

$$\ln q_e = \ln q_m - k\varepsilon^2 \quad (2)$$

$$\varepsilon = RT \ln \left( 1 + \frac{1}{C_e} \right) \quad (3)$$

where  $k$  is a constant related to the adsorption amount ( $\text{mg}^2 \text{mg}^{-2}$ ),  $a_t$  and  $b_t$  are constants of the equation.  $R$  is the ideal gas constant ( $8.314 \text{ J (mol K)}^{-1}$ ),  $T$  (K) is the thermodynamic temperature, and  $\varepsilon$  is the adsorption potential.

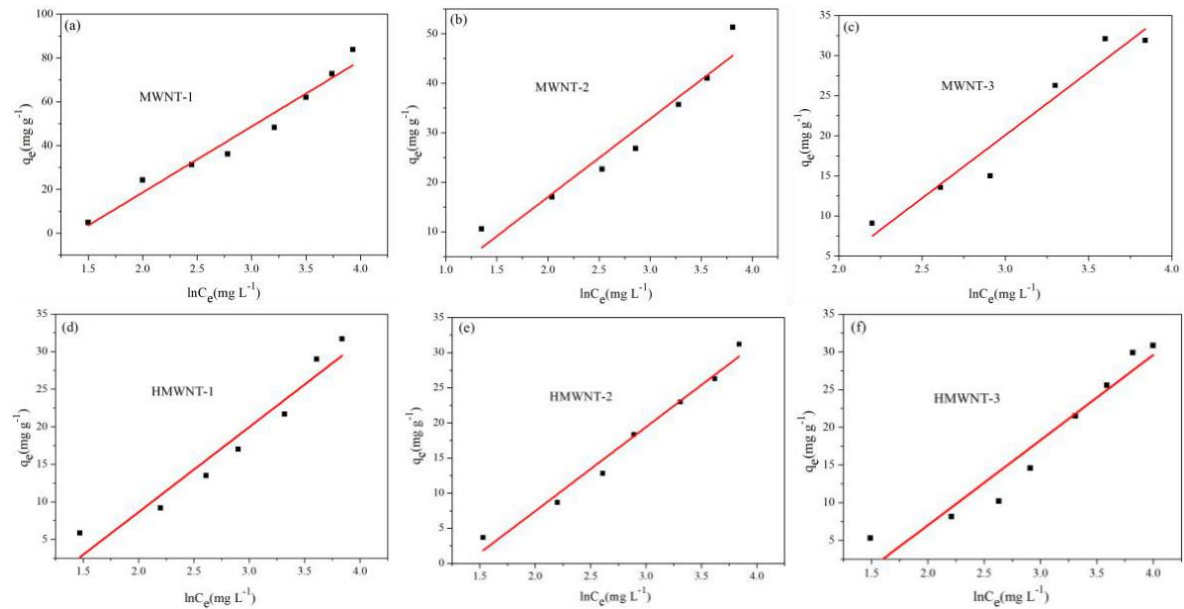

**Figure S2.** Temkin adsorption isotherm of HA adsorption on MWNTs(a)(b)(c) and HMWNTs(d)(e)(f)

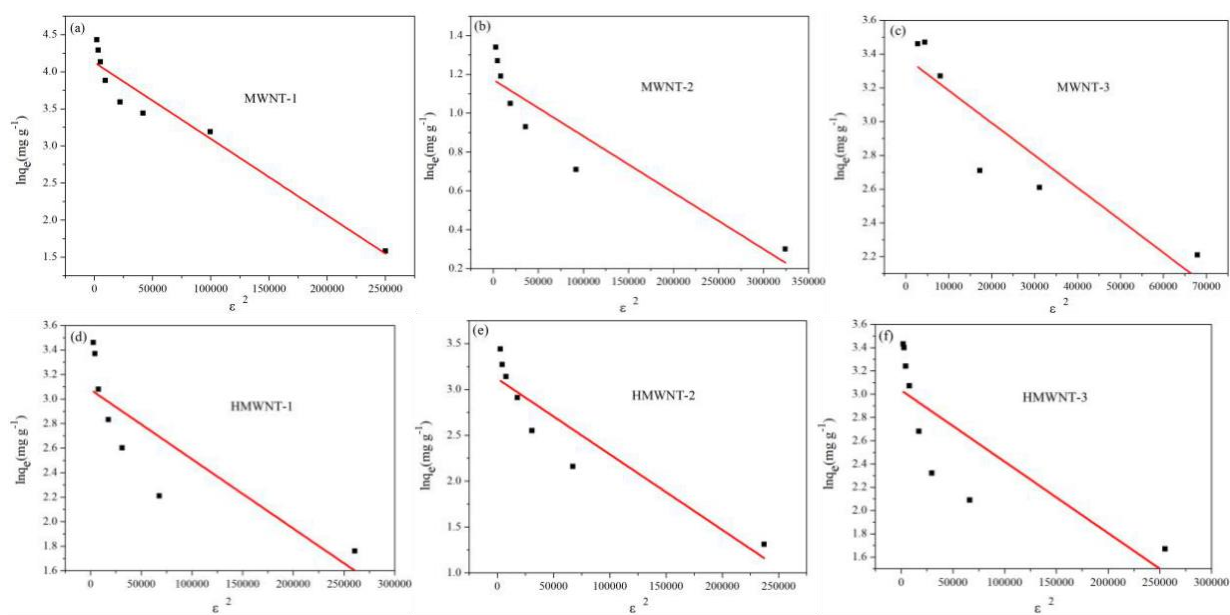

**Figure S3.** Dubinin-Radushkevich adsorption isotherm of HA adsorption on MWNTs  
(a)(b)(c) and HMWNTs(d)(e)(f)

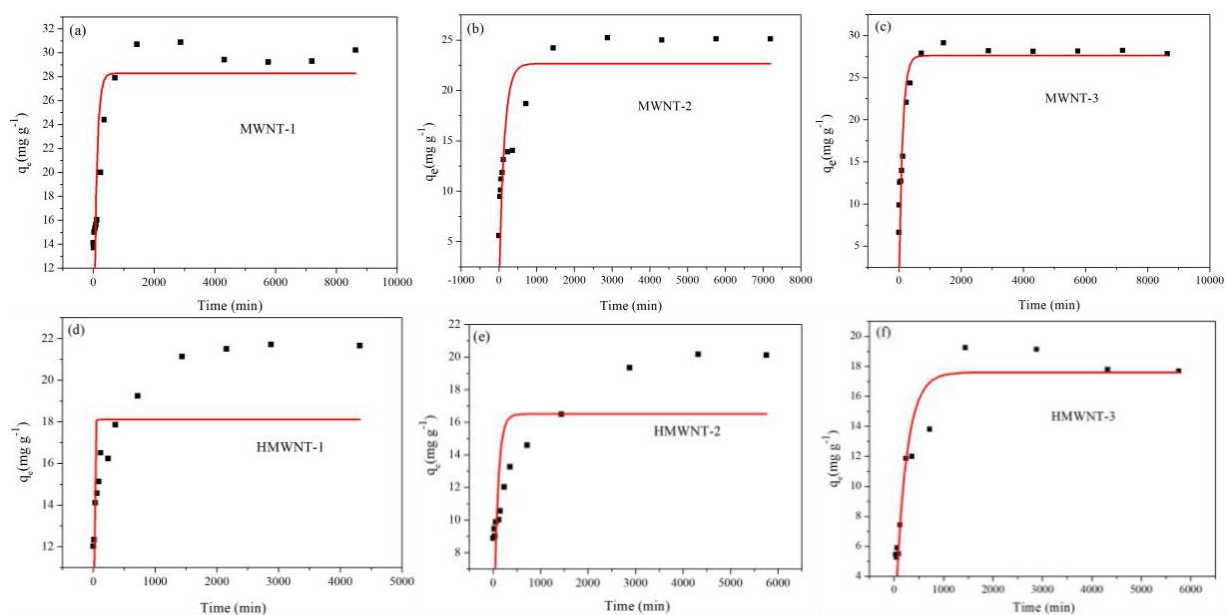

**Figure S4.** Pseudo-first-order kinetic curves of adsorption of HA on the surface of MWNTs (a)(b)(c) and HMWNTs(d)(e)(f)

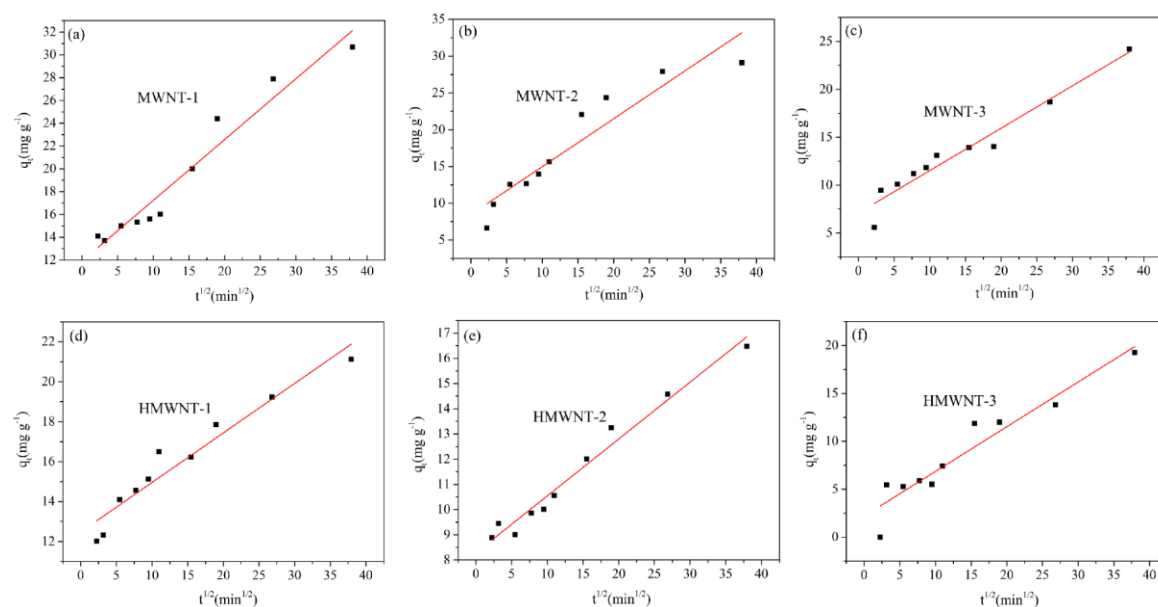

**Figure S5.** Plots of the intraparticle diffusion kinetic curves of adsorption of HA onto MWNTs (a)(b)(c) and HMWNTs(d)(e)(f)

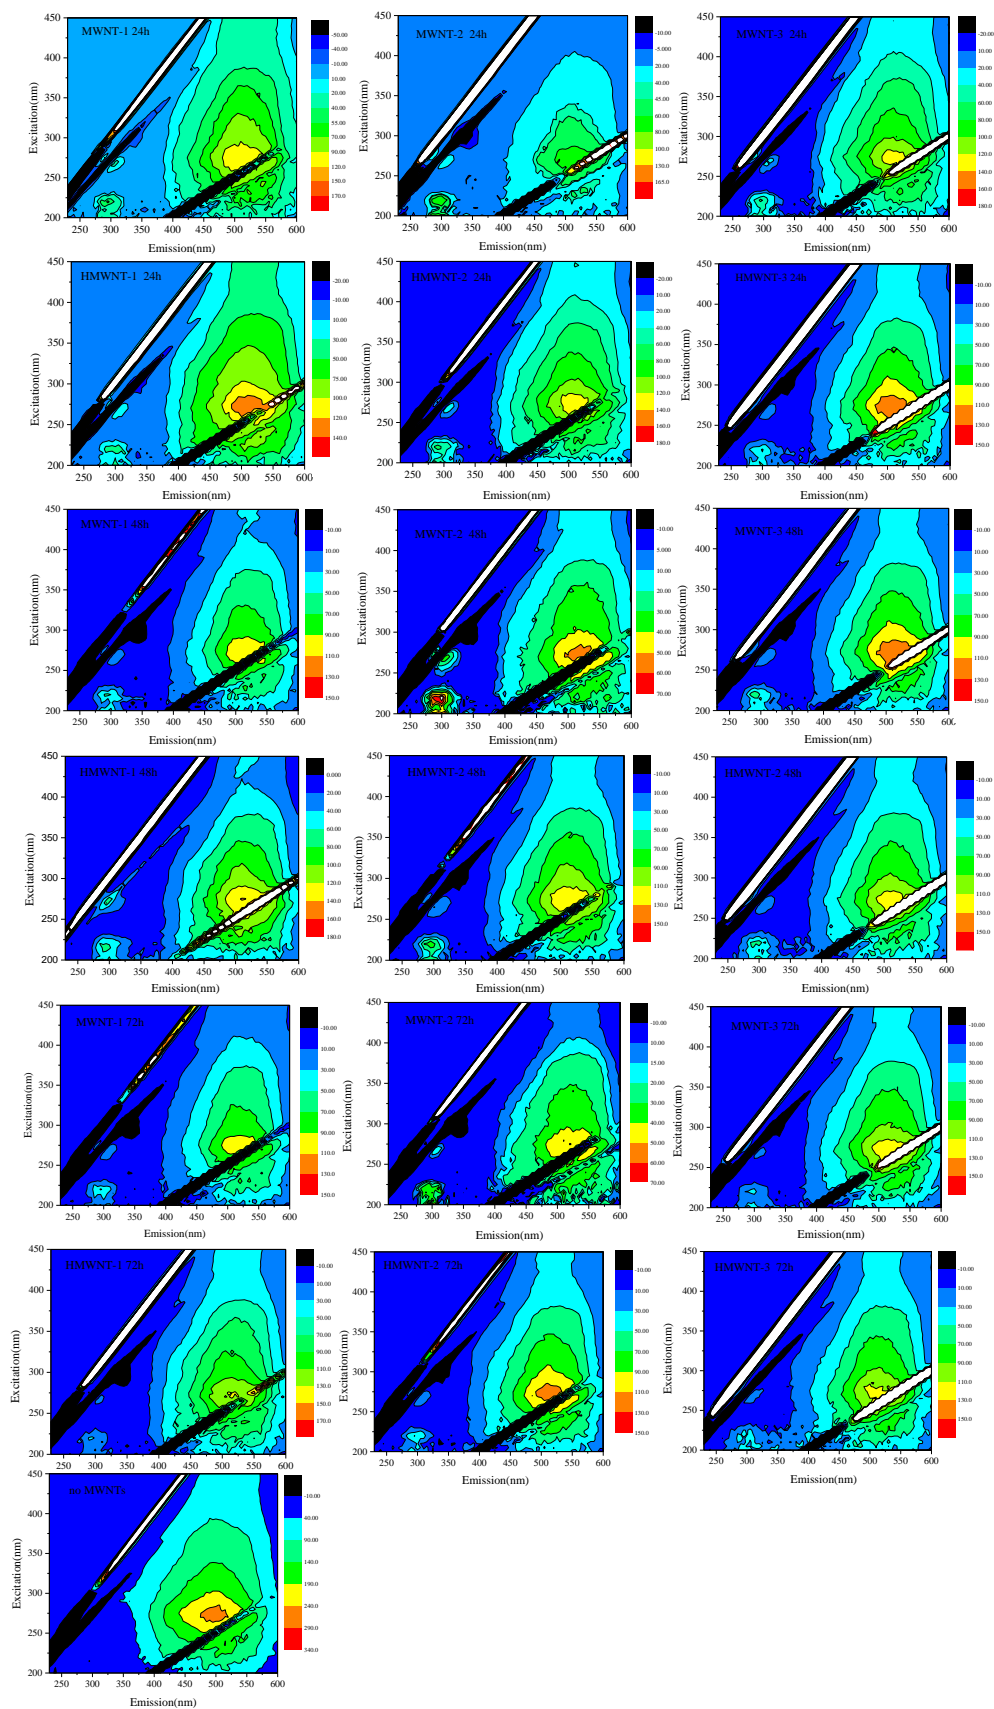

**Figure S6.** Fluorescence excitation-emission matrices (EEM) peaks for HA after adsorption of MWNTs and HMWNTs
